# Supplementary material for: Multi-omics data integration reveals link between epigenetic modifications and gene expression in sugar beet (Beta vulgaris subsp. vulgaris) in response to cold
Source: PubMed Central journal article supplement (PMC8855596; doi:10.1186/s12864-022-08312-2), 2022-02-17
Supplement: 12864_2022_8312_MOESM3_ESM.pdf [file 12864_2022_8312_MOESM3_ESM.pdf]

## Additional File 3

### TOOLS AND IMPLEMENTATION

All used commands are listed below and are separated for the RNA sequenced samples (RNAseq analysis) and the whole genome bisulfite sequenced samples (WGBS analysis). If not explicitly mentioned, all software specific parameters were used by default. If specific packages are used within a used program, it is listed additionally in the relevant section.

#### RNAseq analysis

##### I. QUALITY CHECK

**FASTQC**, Version: 0.11.8

```
fastqc /path/to/fastqcfile.fq.gz
```

**MULTIQC**, Version: 1.7

```
multiqc /path/to/fastqcfiles
```

##### II. TRIMMING

**BBDuk**, Version: 38.69

```
bbduk.sh in1=/path/to/inputfile1.fq.gz  
in2=/path/to/inputfile2.fq.gz  
out1=/path/to/outputfile1.fq.gz  
out2=/path/to/outputfile2.fq.gz  
outs=/path/to/outputSingletons.fq.gz  
ref=/path/to/adapters.fa ktrim=r1 k=23 mink=11 hdist=1  
tbo tpe qtrim=r1 trimq=20 minlen=35
```

##### III. QUALITY CHECK 2

**FASTQC**, Version: 0.11.8

```
fastqc /path/to/.../fastqcfile.fq.gz
```

**MULTIQC**, Version: 1.7

```
multiqc /path/to/.../fastqcFiles
```

#### IV. MAPPING

**STAR**, Version: 2.5.0a

```
STAR --runThreadN 12 --runMode genomeGenerate --genomeDir  
/path/to/genomeIndices --genomeFastaFiles  
/path/to/referenceGenome.fna -sjdbGTFfile  
/path/to/annotationFile.gff3 --sjdbOverhang 149 --  
sjdbGTFfeatureExon CDS --sjdbGTFtagExonParentTranscript  
ID --sjdbGTFtagExonParentGene Parent
```

```
STAR --runThreadN 12 --readFilesCommand zcat --  
readFilesIn /path/to/inputfile1.fq.gz  
/path/to/inputfile2.fq.gz --genomeDir  
/path/to/genomeIndices --alignIntronMax 1000 --outSAMtype  
BAM SortedByCoordinate --outReadsUnmapped Fastx --  
outFileNamePrefix OutputFilePrefix
```

```
STAR --runThreadN 12 --readFilesCommand zcat --  
readFilesIn /path/to/inputfile1.fq.gz  
/path/to/inputfile2.fq.gz --genomeDir  
/path/to/genomeIndices --alignIntronMax 1000 --  
sjdbFileChrStartEnd /path/to/FileSJ.out.tab --outSAMtype  
BAM SortedByCoordinate --outReadsUnmapped Fastx --  
outFileNamePrefix OutputFilePrefix
```

#### V. FEATURE COUNTING

**FEATURECOUNTS**, Version: 1.5.0

```
featureCounts -p -M --primary -t gene -g Name -s 0 -G  
/path/to/RefBeet-1.2.fna -a path/to/annotationFile.gff3  
-T 10 -o /path/to/OutputFilename.txt  
/path/to/inputfile1.bam /path/to/inputfile2.bam ...  
/path/to/inputfileN.bam
```

#### VI. DIFFERENTIAL GENE EXPRESSION ANALYSIS

**R**, Version: 4.0.2 - 4.1.2 “Bird Hippie”

**DESEQ2**, Version: 1.39.0

```

# design: control for genotype-dependent cold-response while testing effect
of temperature

dds <- DESeq2::DESeqDataSetFromMatrix(countmatrix, colData = sampledata, rowRanges = rowdata, design = ~ genotype + temp + genotype:temp)

dds <- estimateSizeFactors(dds)

fpkms <- fpkm(dds)
normcounts <- counts(dds, normalized = TRUE)

res <- DESeq2::results(dds4, alpha = 0.05, pAdjustMethod = "bonferroni")

reswald.05bonf <- DESeq2::results(dds, name="temp_C0_vs_C20",
                                test="Wald",
                                alpha = 0.05,
                                pAdjustMethod = "bonferroni")

```

## WGBS analysis

### I. QUALITY CHECK

**FASTQC**, Version: 0.11.8

```
fastqc /path/to/file.fq.gz
```

**MULTIQC**, Version: 1.7

```
multiqc /path/to/fastqcFiles
```

### II. TRIMMING

**BBDuk**, Version: 38.69

```
bbduk.sh in1=/path/to/inputfile1.fq.gz
in2=/path/to/inputfile2.fq.gz
out1=/path/to/outputfile1.fq.gz
out2=/path/to/outputfile2.fq.gz
outs=/path/to/outputSingletons.fq.gz
```

```
ref=/path/to/adapters.fa ktrim=rl k=23 mink=11 hdist=1
tbo tpe qtrim=rl trimq=20 ftl=18 minlen=35
```

### III. QUALITY CHECK 2

**FASTQC**, Version: 0.11.8

```
fastqc /path/to/file.fq.gz
```

**MULTIQC**, Version: 1.7

```
multiqc /path/to/fastqcFiles
```

### IV. MAPPING

**BISMARK**, Version: 22.3

```
bismark_genome_preparation --parallel 6 --verbose
/path/to/genome_preparation_file
```

```
bismark --non_bs_mm --output_dir /path/to/ mapping_Output
--unmapped --genome_folder
/path/to/folder/containing/ReferenceGenomeAndAnnotation
/path/to/inputfile1.fastq.gz /path/to/inputfile2.fastq.gz
... /path/to/inputfileN.fastq.gz
```

```
deduplicate_bismark --paired --output_dir
/path/to/deduplication_Output --bam
/path/to/inputfile1.bam /path/to/inputfile2.bam ...
/path/to/InputFileN.bam
```

```
bismark_methylation_extractor --paired-end --scaffolds --
bedGraph --cytosine_report --CX_context --
split_by_chromosome --cutoff 8 -o
/path/to/methylationExtractionOutput --genome_folder
/path/to/ReferenceGenomeAndAnnotation
/path/to/inputfile1.bam /path/to/inputfile2.bam ...
/path/to/inputfileN.bam
```

### V. METHYLATION PROFILING ALONG GENES

**HOME**, Version: 1.0.0

```
python MethGET/preprocess.py -s SampleList.txt -g
GeneAnnotationFile.gtf
```

```
python MethGET/metagene.py -n SampleName -p region -  
No_bins 30
```

## VI. DMC DETECTION

**R**, Version: 4.1.2

**methylKit**, Version: 1.19.0

```
sample.ids <- list("GT1_20_1", "GT1_20_2", "GT1_20_3",  
                 "GT2_20_1", "GT2_20_2", "GT2_20_3",  
                 "GT1_0_1", "GT1_0_2", "GT1_0_3",  
                 "GT2_0_1", "GT2_0_2", "GT2_0_3")  
  
treatment <- c(1,1,1,1,1,1,0,0,0,0,0,0)  
  
# reads and processes sorted BAM files (one per sample) and stores processe  
d data as tabix files (one per context and sample)  
db.raw.list <- processBismarkAln(location=as.list(bis.BAM.files),  
                                sample.id = sample.ids,  
                                assembly = "Refbeet1.2.2",  
                                save.folder="./input",  
                                save.context = c("CpG", "CHG", "CHH"),  
                                read.context = "none",  
                                # for paired-end:  
                                nolap = TRUE,  
                                mincov = 8,  
                                minqual = 20,  
                                phred64 = FALSE,  
                                treatment = c(1,1,1,1,1,1,0,0,0,0,0,0),  
                                save.db = TRUE)
```

```
# saved tabix files (.bgz; for individual samples) can be read via:
```

```
CpG.files <- list.files("./input/methylDB.CpG", "(GT1|GT2).*\\.bgz$", full.names = TRUE)
```

```
# db.raw.list.CpG can be created from single databases created via processBismarkAlign:
```

```
db.raw.list.CpG <- methRead(as.list(CpG.files),  
                           treatment=c(1,1,1,0,0,0,1,1,1,0,0,0),  
                           dbtype = "tabix",  
                           save.db = TRUE,  
                           dbdir = "methylDB.CpG",  
                           mincov = 8)
```

```
# To create one object for all samples ("baseDB"):
```

```
db.base.CpG <- methylKit::unite(db.raw.list.CpG, destrand = FALSE)
```

```
# or, when a base.db object has already been created:
```

```
base.CpG.file <- "./methylDB.CpG/methylBase_CpG.txt.bgz"
```

```
base.CpG <- readMethylDB(base.CpG.file)
```

```
# creates a matrix containing percent methylation values
```

```
perc.meth.CHH <- percMethylation(base.CHH, rowids = TRUE)
```

```
# DMC detection:
```

```
dmc.CpG <- calculateDiffMeth(base.CpG,  
                            dbdir = "./input/methylDB.CpG",  
                            suffix = "DMC-CpG",  
                            dbtype = "tabix",  
                            save.db = TRUE,  
                            mincov = 8)
```

```
dmc.CpG.05 <- getMethylDiff(dmc.CpG,  
                           qvalue=0.05,  
                           difference = 0,  
                           suffix = "q05")
```

## VII. DMR DETECTION

### HOME, Version: 1.0.0

```
HOME-pairwise -i /path/to/samplefile/samplefile.txt -t CG -wrt C20 -  
npp 10 -o /path/to/output/directory/CpG &&
```

```
HOME-pairwise -i /path/to/samplefile/samplefile.txt -t CHG -wrt C20 -  
npp 10 -o /path/to/output/directory/CHG &&
```

```
HOME-pairwise -i /path/to/samplefile/samplefile.txt -t CHH -wrt C20 -  
npp 10 -o /path/to/output/directory/CHH
```
